# Supplementary material for: Characterization of cognitive symptoms in post COVID-19 patients
Source: PubMed Central journal article supplement (PMC11579195; doi:10.1007/s00406-024-01821-z), 2024-05-13
Supplement: 406_2024_1821_MOESM1_ESM.pdf [file 406_2024_1821_MOESM1_ESM.pdf]

## Supplementary Materials

**Article Title:**

Characterization of Cognitive Symptoms in Post COVID-19 Patients

**Journal:**

European Archives of Psychiatry and Clinical Neuroscience (EAPCN)

**Authors:**

Michael Ruzicka, Simone Sachenbacher, Fides Heimkes, Aline Olivia Uebleis, Susanne Karch, Fabienne Grosse Wentrup, Gerardo Jesus Ibarra Fonseca, Nora Wunderlich, Johannes Bogner, Julia Mayerle, Michael von Bergwelt-Baildon, Peter Falkai, Marion Subklewe, Thomas Ruzicka, Christopher Benesch, Elisabeth Valdinoci, Anna Pernpruner, Anabel Thomas, Bernhard Heindl, Hans Christian Stubbe\*, Kristina Adorjan\*

\*Contributed equally

**Corresponding author:**

Michael Ruzicka

University Hospital / LMU Klinikum, Department of Medicine III, LMU Munich

Marchioninistrasse 15, 81377 Munich, Germany

Email: michael.ruzicka@med.uni-muenchen.de

Phone: +49 (0)89 4400-0

Fax: +49 (0)89 4400 74994

Supplementary Figure 1. Density distribution of acute SARS-CoV-2 infections across time and by CS severity

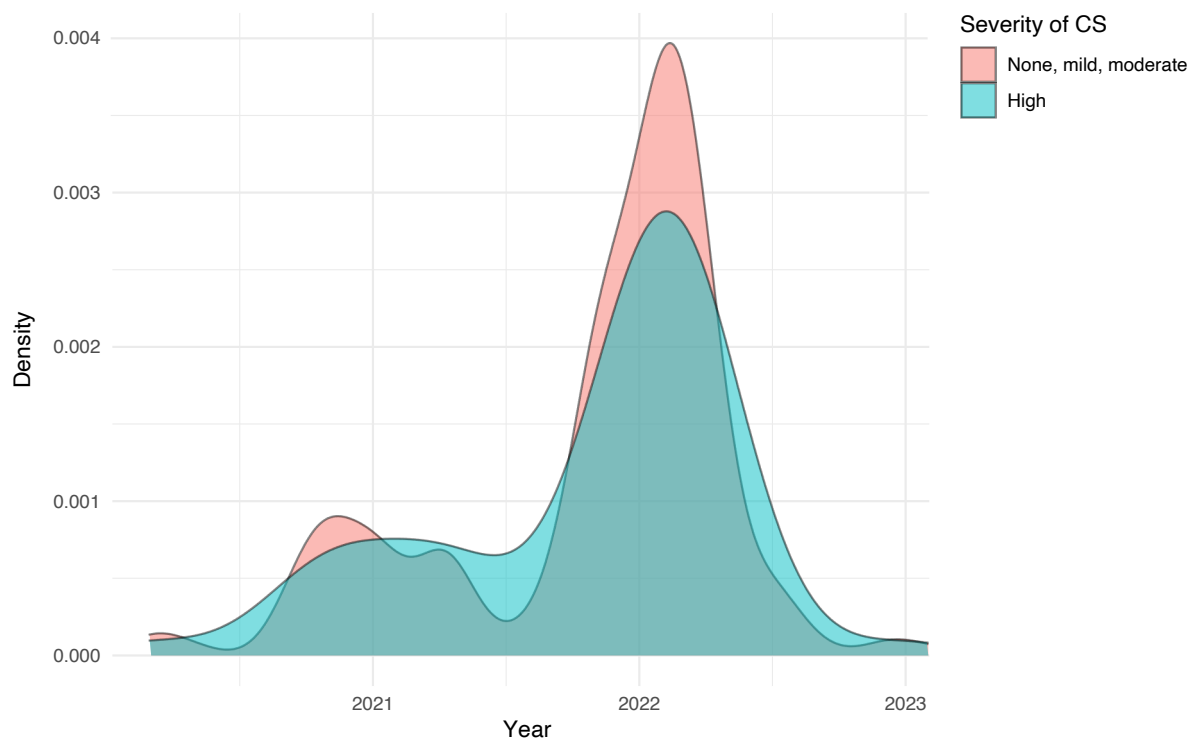

**Supplementary Table 1. Neurocognitive assessments, respective abbreviations and cognitive domains assessed**

| <b>Neurocognitive assessment</b>                                              | <b>Abbreviation</b> | <b>Cognitive domain assessed</b>                           |
|-------------------------------------------------------------------------------|---------------------|------------------------------------------------------------|
| <b>Vocabulary test</b>                                                        | VT                  | Premorbid intelligence quotient (IQ)                       |
| <b>Trail Making Test – part A</b>                                             | TMT-A               | Visuomotoric speed                                         |
| <b>Trail Making Test – part B</b>                                             | TMT-B               | Visuomotoric speed, cognitive flexibility & working memory |
| <b>Letter-Number-Span</b>                                                     | LNS                 | Working memory                                             |
| <b>d2-R Test of Attention</b>                                                 | d2R                 | Concentration, attention                                   |
| Concentration capacity                                                        | - CC                |                                                            |
| Speed of operation                                                            | - Sp                |                                                            |
| Accuracy                                                                      | - Acc               |                                                            |
| <b>The Repeatable Battery for the Assessment of Neuropsychological Status</b> | RBANS               |                                                            |
| List Learning <sup>1</sup>                                                    | - LL                | Immediate memory                                           |
| Memorized Words in the 4 <sup>th</sup> Round <sup>2</sup>                     | - MW4               |                                                            |
| Story Memory <sup>3</sup>                                                     | - SM                |                                                            |
| List Recall <sup>4</sup>                                                      | - LR                | Delayed memory                                             |
| List Recognition <sup>5</sup>                                                 | - LRg               |                                                            |
| Story Recall <sup>6</sup>                                                     | - SR                |                                                            |
| Figure Recall <sup>7</sup>                                                    | - FR                |                                                            |
| Figure Copy <sup>8</sup>                                                      | - FC                | Visuospatial function / construction                       |
| Line Orientation <sup>9</sup>                                                 | - LO                |                                                            |
| Digit Span <sup>10</sup>                                                      | - DS                | Attention                                                  |
| Coding / Symbol-Number-Test <sup>11</sup>                                     | - SNT               |                                                            |
| Semantic Fluency <sup>12</sup>                                                | - SF                | Language                                                   |
| Picture Naming <sup>13</sup>                                                  | - PN                |                                                            |

- <sup>1</sup>Learning new words from a list of 10 words
- <sup>2</sup>Memorized words in the fourth round
- <sup>3</sup>Memorized details from a given story with 12 details
- <sup>4</sup>Recalled words from a list of 10 after delay
- <sup>5</sup>Number of words the patient can refer to from a previous list of words (n = 20) correctly
- <sup>6</sup>Number of details the patient can remember from a story (with 12 details) after delay
- <sup>7</sup>Memorizing a complex geometric image
- <sup>8</sup>Patient is asked to draw a complex geometric image presented in front of them
- <sup>9</sup>Patient is asked to recognize a certain angle out of multiple lines
- <sup>10</sup>Patient is asked to repeat numerical sequences in the right order
- <sup>11</sup>Patient is asked to name numbers related to symbols in a number-symbol-matrix
- <sup>12</sup>Patient is asked to name as many names as possible of vegetables and fruit in 1 minute
- <sup>13</sup>Patient is asked to name the items on ten pictures

**Supplementary Table 2. Number of patients below -1SD of each NCT subtest**

| NCT subtest       | Number of patients below -1SD<br>( $n_{\text{total}} = 78$ ) |
|-------------------|--------------------------------------------------------------|
| <i>TMT-A</i>      | 23 (29.5%)                                                   |
| <i>TMT-B</i>      | 20 (25.6%)                                                   |
| <i>LNS</i>        | 25 (32.9%)                                                   |
| <i>d2-R - CC</i>  | 34 (45.3%)                                                   |
| <i>d2-R - Sp</i>  | 8 (10.5%)                                                    |
| <i>d2-R - Acc</i> | 14 (20.9%)                                                   |
| RBANS - LL        | 4 (5.1%)                                                     |
| RBANS - MW4       | 2 (2.6%)                                                     |
| RBANS - SM        | 12 (15.4%)                                                   |
| RBANS - LR        | 1 (1.3%)                                                     |
| RBANS - LRg       | 22 (28.2%)                                                   |
| RBANS - SR        | 12 (15.4%)                                                   |
| RBANS - FR        | 9 (11.5%)                                                    |
| RBANS - FC        | 27 (34.6%)                                                   |
| RBANS - LO        | 4 (5.1%)                                                     |
| RBANS - DS        | 37 (47.4%)                                                   |
| RBANS - SNT       | 34 (43.6%)                                                   |
| RBANS - SF        | 20 (25.6%)                                                   |
| RBANS - PN        | 12 (15.4%)                                                   |

**Supplementary Table 3. RBANS results of patients who reported hiCS vs mild to moderate CS**

| <b>Reported intensity of cognitive symptoms</b> | <b>High<br/>(n = 26)</b> | <b>Mild or moderate<br/>(n = 52)</b> | <b>p value</b> |
|-------------------------------------------------|--------------------------|--------------------------------------|----------------|
| <b>RBANS - LL</b>                               | 110 [96.5;125]           | 113 [106;123]                        | 0.478          |
| <b>RBANS - MW4</b>                              | 106 [95.0;108]           | 108 [104;108]                        | 0.192          |
| <b>RBANS - SM</b>                               | 97.5 [89.2;112]          | 100 [89.8;107]                       | 0.986          |
| <b>RBANS - LR</b>                               | 107 [101;112]            | 110 [102;122]                        | 0.477          |
| <b>RBANS - LRg</b>                              | 85.0 [75.2;91.5]         | 89.0 [85.0;95.0]                     | 0.192          |
| <b>RBANS - SR</b>                               | 93.0 [87.2;105]          | 100 [92.8;104]                       | 0.598          |
| <b>RBANS - FR</b>                               | 103 [94.5;111]           | 104 [94.0;114]                       | 0.598          |
| <b>RBANS - FC</b>                               | 87.0 [80.5;98.0]         | 91.0 [82.0;107]                      | 0.478          |
| <b>RBANS - LO</b>                               | 104 [92.5;120]           | 108 [99.8;122]                       | 0.590          |
| <b>RBANS - DS</b>                               | 80.5 [72.2;89.8]         | 92.0 [78.8;102]                      | 0.192          |
| <b>RBANS - SNT</b>                              | 84.0 [68.2;98.5]         | 93.0 [82.0;108]                      | 0.192          |
| <b>RBANS - SF</b>                               | 98.0 [88.2;103]          | 98.0 [81.8;114]                      | 0.985          |
| <b>RBANS - PN</b>                               | 106 [81.0;107]           | 106 [106;106]                        | 0.986          |

All results are depicted as age normalized standardized values (ASV) with a norm value of 100.
